# Supplementary material for: Selection of Suitable Endogenous Reference Genes for Relative Copy Number Detection in Sugarcane
Source: MDPI journal article supplement (doi:10.3390/ijms15058846), 2014-05-19
Supplement: s1 [file s1]

# Supplementary Information

**Figure S1.** The amplification curves, melting curves and standard curves obtained in qPCR assays based on two potential reference primer pairs in Badila (*Saccharum officinarum*). (a) P4H-1; (b) P4H-3; (c) APRT-1; (d) APRT-2; (e) CYC-1; (f) CYC-2; (g) TST-1; (h) TST-3; (i) ENOL-3; (j) PRR-1.

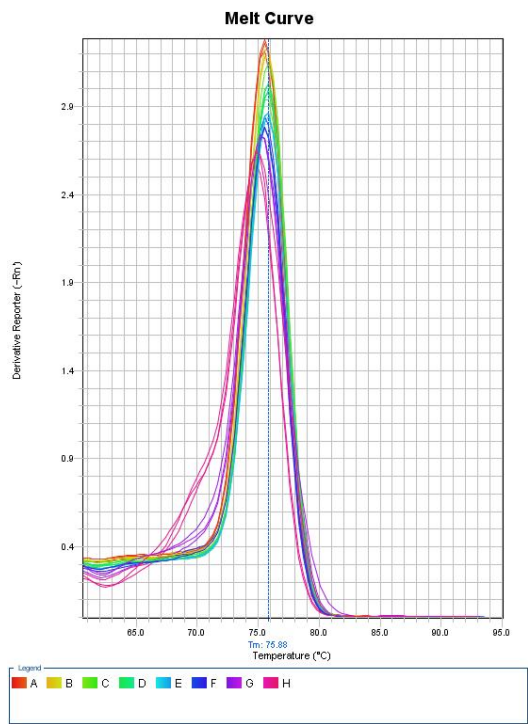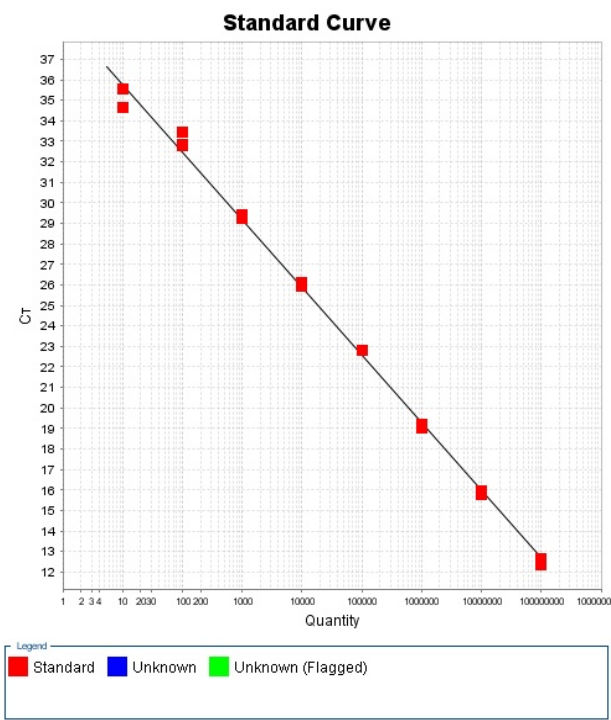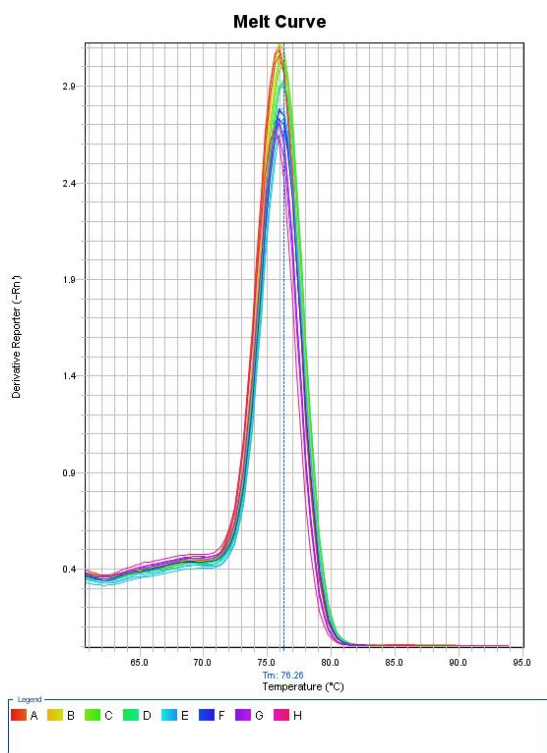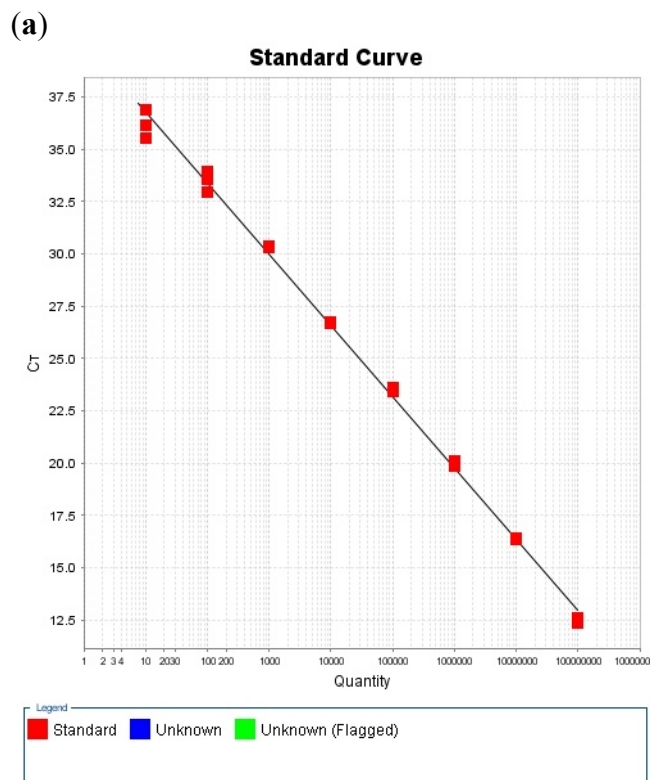

**(b)**

Figure S1. Cont.

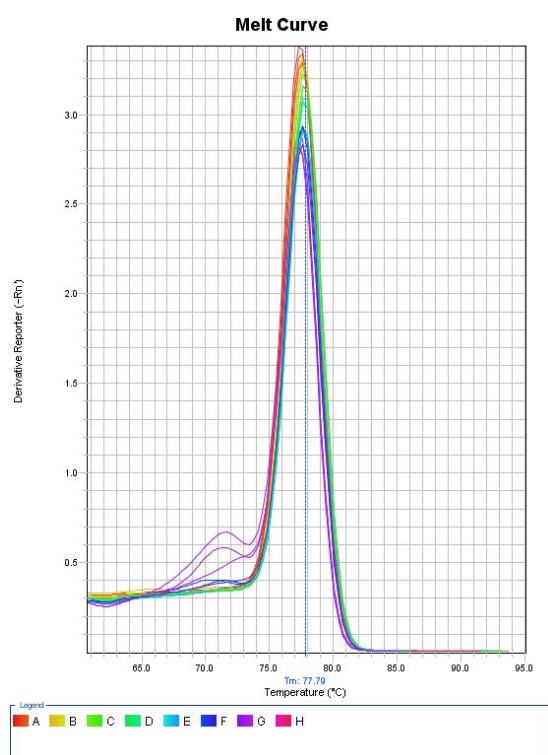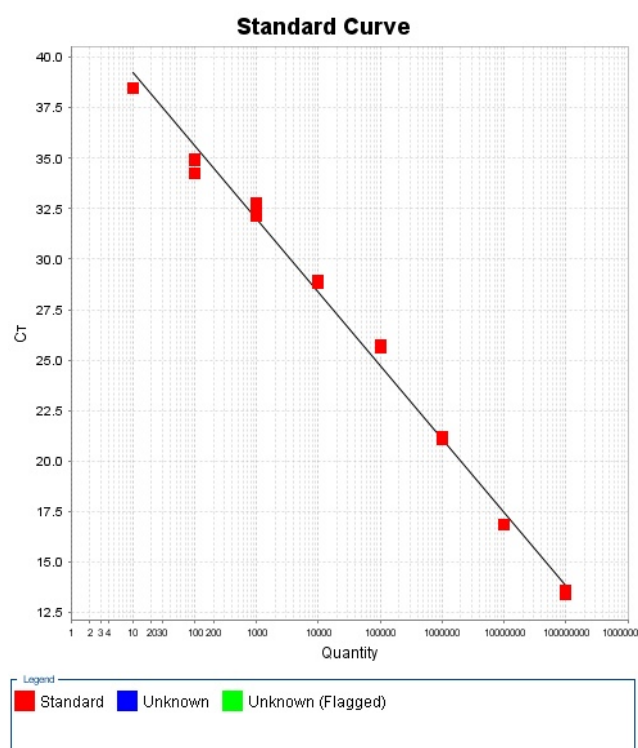

(c)

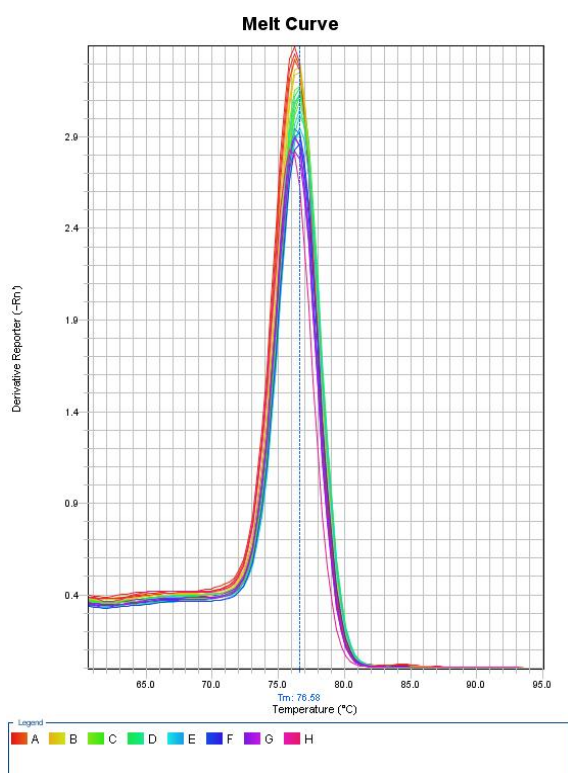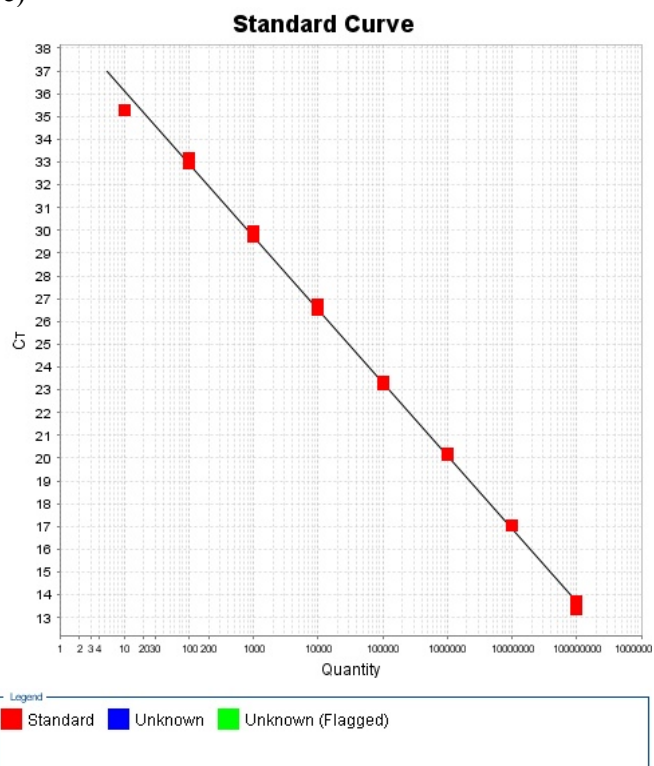

(d)

Figure S1. Cont.

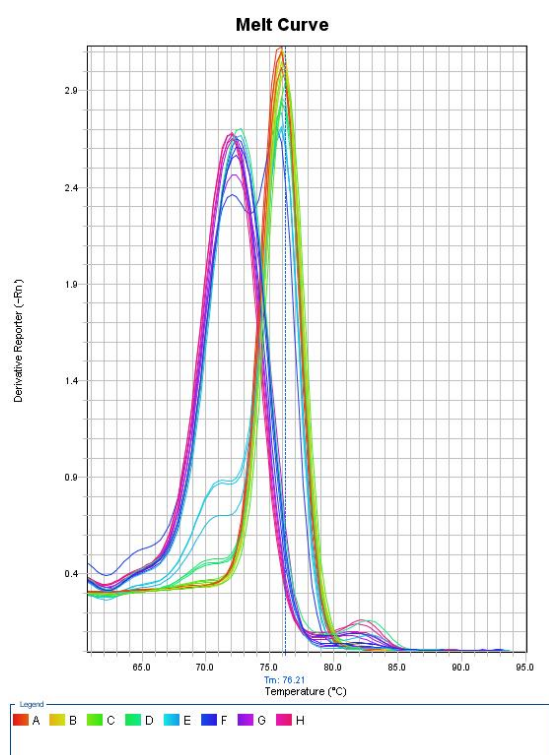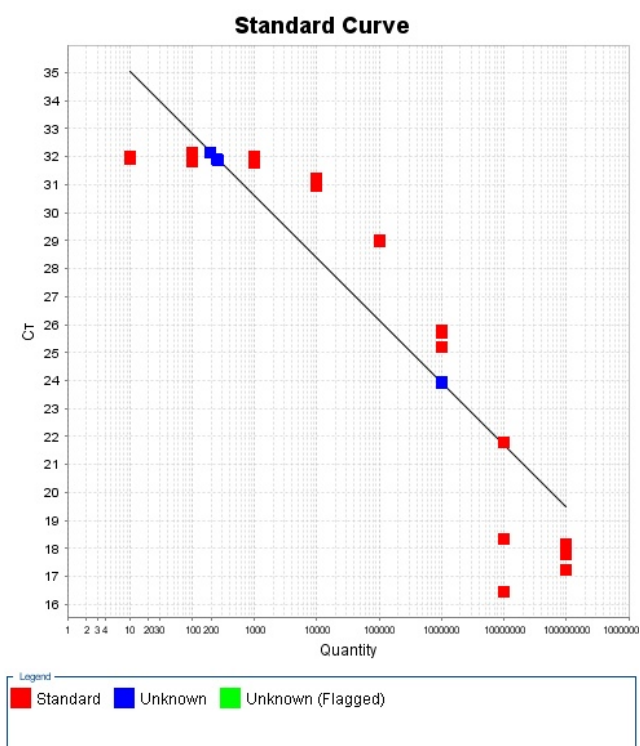

(e)

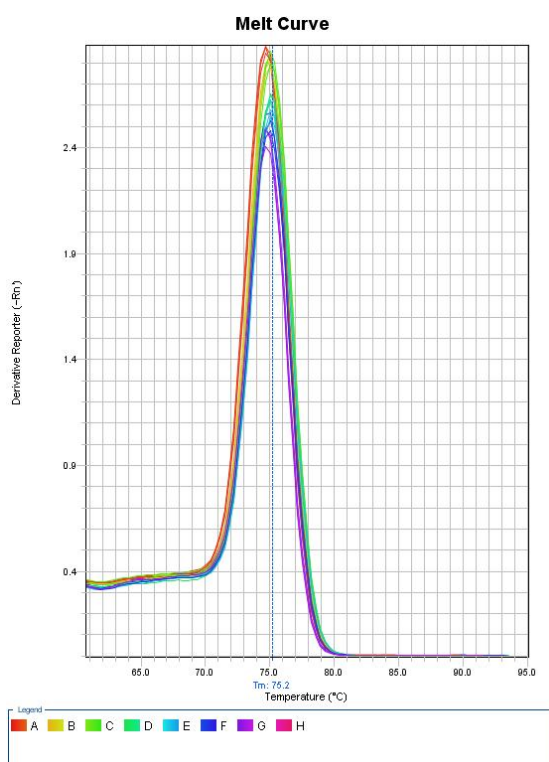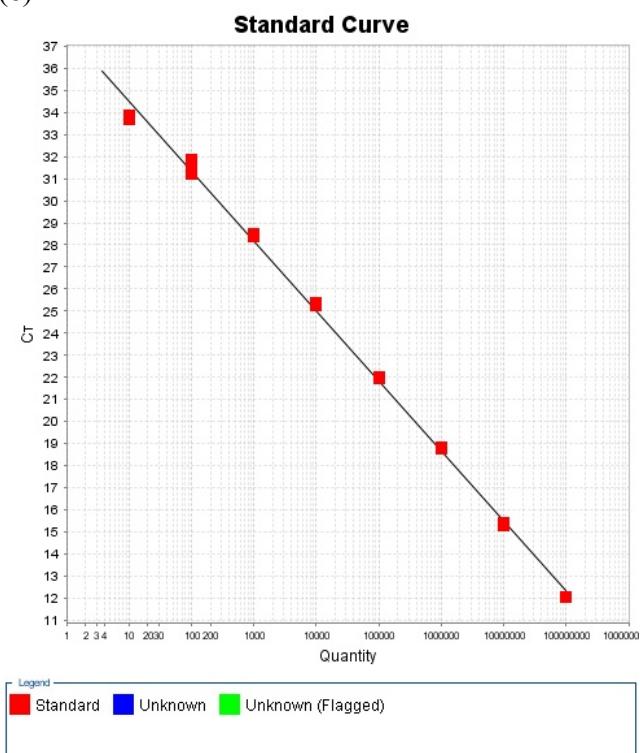

(f)



Figure S1. Cont.

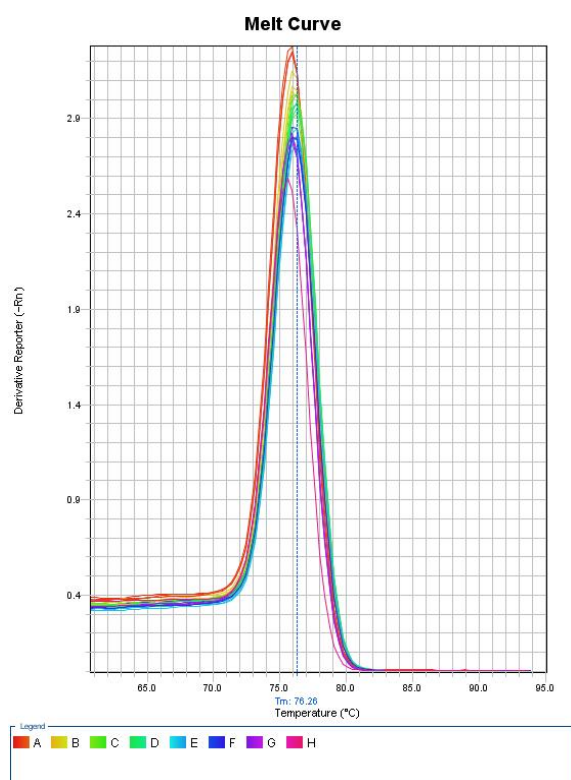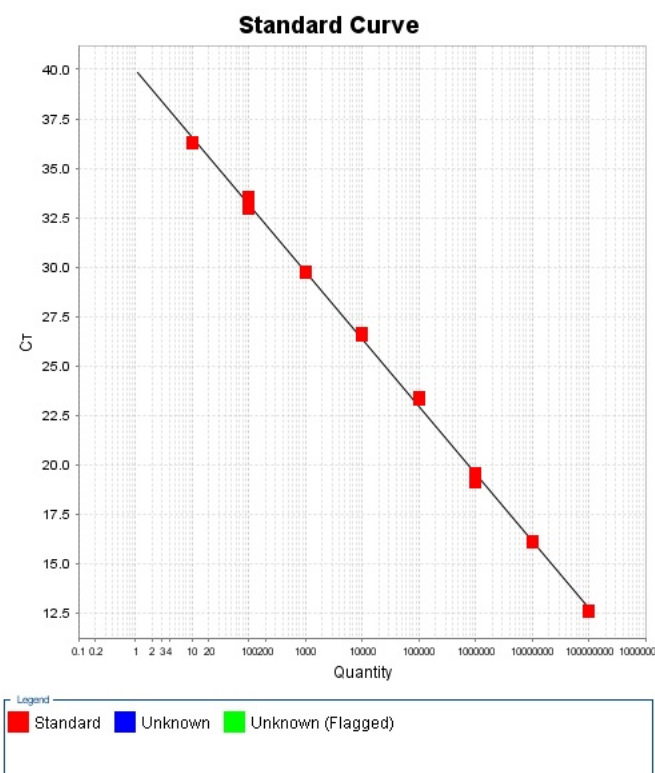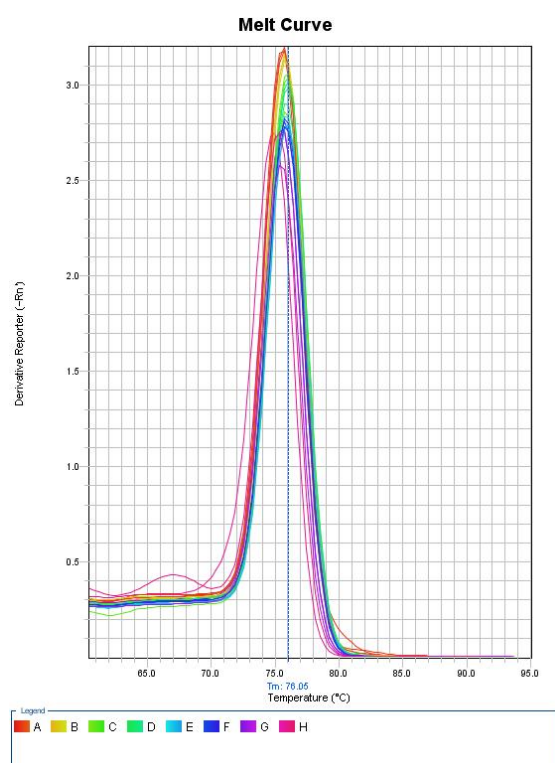

(g)

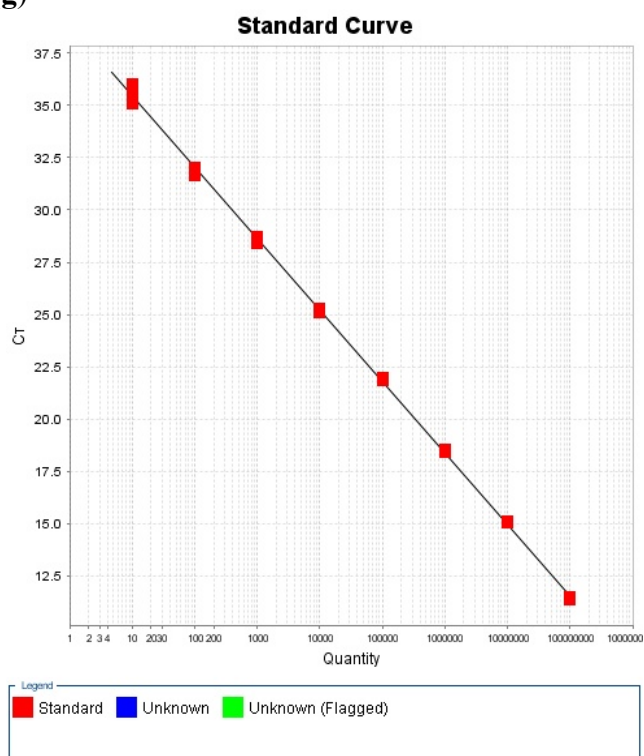

(h)

Figure S1. Cont.

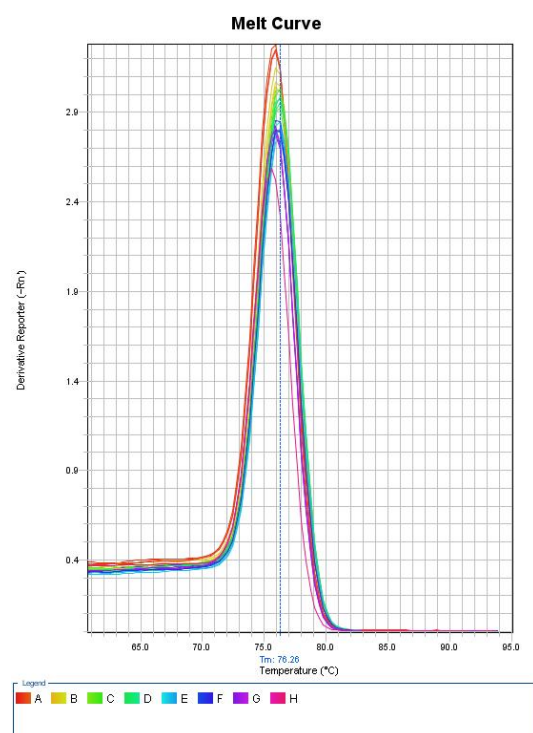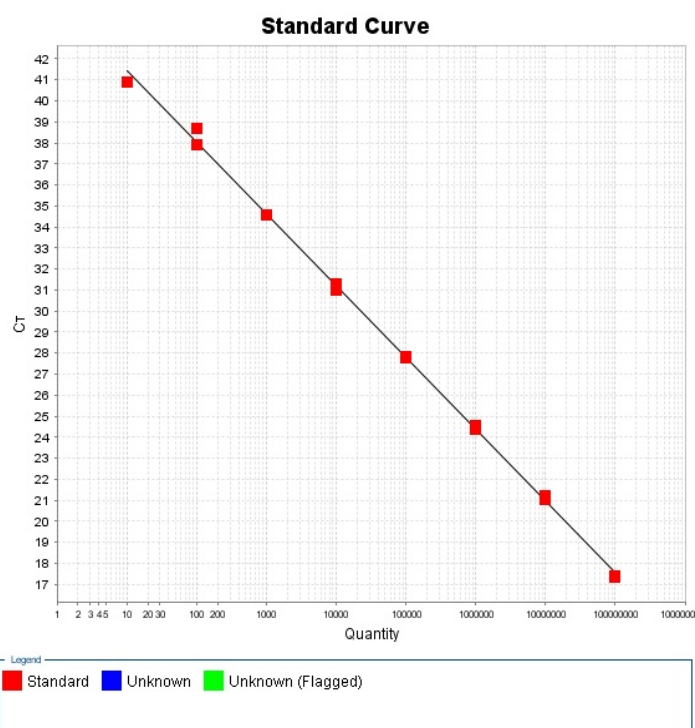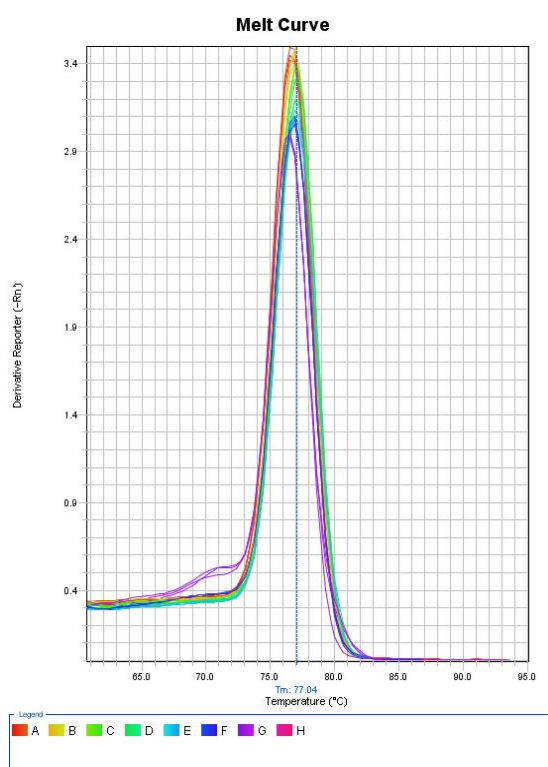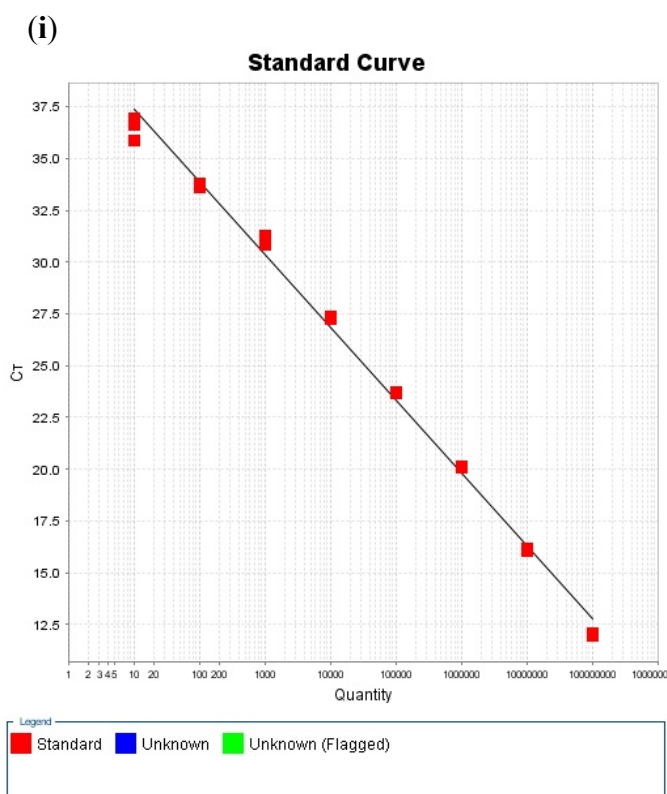

(j)
